# Supplementary material
Source: MDPI journal article supplement (https://www.mdpi.com/2035-8377/16/3/43)
Supplement: s1 [file s1]

**P: stroke**

stroke

cerebrovascular accident\*

cerebral infarction

CVA

CVAs

cerebrovascular apoplexy

apoplexy

brain vascular accident\*

cerebrovascular stroke\*

cerebral stroke\*

acute stroke\*

acute cerebrovascular accident\*

hemipleg\* (hemiplegia, hemiplegic)

hemipare\* (hemiparesis, hemiparetic)

**I: PAS**

PAS

pair\* associat\* stim\* (paired associative stimulation)

dual stim\* (dual stimulation)

combined stim\* (combined stimulation)

paired pulse stim\*

C: -

**O: motor recovery**

lower extremity\*

lower limb\*

membrum inferius

walking

gait

locomotion

cycl\*

leg

hip

knee

ankle

foot

upper extremit\*  
upper limb\*  
membrum superius  
arm  
shoulder  
elbow  
wrist  
hand  
grip\*  
motor control  
motor function  
motor learning  
strength  
long time depression  
long time potentiation  
cortical plasticit\*  
plasticit\*  
neuroplasticit\*  
synaptic plasticit\*  
metaplasticit\*  
motor cortex excitabilit\*  
function recover\*  
motor recover\*  
muscle strength  
voluntary activation  
neuromodulation  
MEP  
motor evoked potential  
muscle recruitment
